# Supplementary material
Source: MDPI journal article supplement (https://www.mdpi.com/1422-0067/23/10/5834)
Supplement: s1 [file s1]

Archive with 2 entries (2 files):
- Supplement S1.pdf
- Supplement S2.pdf
